# Supplementary material for: Medical Wikis Dedicated to Clinical Practice: A Systematic Review
Source: PubMed Central journal article supplement (PMC4392552; doi:10.2196/jmir.3574), 2015-02-19
Supplement: jmir_v17i2e48_app1.pdf [file jmir_v17i2e48_app1.pdf]

## Appendix 1 : Google search

### 1. Google queries

| Language       | Search criteria                                | Date     | Resulting pages | Relevant pages |
|----------------|------------------------------------------------|----------|-----------------|----------------|
| English        | "list of medical wikis"                        | 04/10/11 | 20,500          | 2              |
| English        | "list of medical wikis" -davidrothman -rothman | 04/10/11 | 62              | 12             |
| Chinese simpl. | "医疗维基"                                         | 04/10/11 | 12              | 1              |
| Chinese trad.  | "醫療維基"                                         | 04/10/11 | 23              | 0              |
| Spanish        | lista+"wikis médicos"                          | 04/10/11 | 54              | 6              |
| Japanese       | "医療ウイキ" +"のリスト"                                | 04/10/11 | 88              | 1              |
| French         | liste+"wikis médicaux"                         | 04/10/11 | 25              | 4              |
| Portuguese     | lista+"wiki médicos"                           | 04/10/11 | 20              | 0              |
| German         | liste+"medizinischer wikis"                    | 04/10/11 | 4               | 1              |
| Arabic         | قائمة + الويكيات + الطبية                      | 04/10/11 | 34              | 0              |
| Russian        | список+"медицинские вики"                      | 04/10/11 | 6               | 0              |
| Korean         | "의료 위키"+목록                                     | 04/10/11 | 12              | 0              |
| <b>Total</b>   |                                                |          | <b>341</b>      | <b>27</b>      |

### 2. Google results despoliation

| Relevant pages (lists of medical wikis, or wikis themselves)                                                                            | Language | Last update | Potentially relevant URLs displayed |
|-----------------------------------------------------------------------------------------------------------------------------------------|----------|-------------|-------------------------------------|
| 1 <a href="#">davidrothman.net : List of Medical Wikis</a>                                                                              | En       | 21/01/09    | 57                                  |
| 2 <a href="#">davidrothman.net : More Health Information Wikis</a>                                                                      | En       | 07/08/08    | 7                                   |
| 3 <a href="#">Wikipedia : Category:Encyclopedias on medicine</a>                                                                        | En       | 24/12/10    | 7                                   |
| 4 <a href="#">Wikipedia : Online medical wiki encyclopedias</a>                                                                         | En       | 23/08/11    | 7                                   |
| 5 <a href="#">Healthplusplus</a>                                                                                                        | En       | 20/01/11    | 42                                  |
| 6 <a href="#">Dr Penna</a>                                                                                                              | En       | 29/11/09    | 9                                   |
| 7 <a href="#">P2pfondation : Medical Knowledge Sharing</a>                                                                              | En       | 25/02/10    | 8                                   |
| 8 <a href="#">ScienceRoll</a>                                                                                                           | En       | 27/03/07    | 29                                  |
| 9 <a href="#">HLWIKI : Top 50 Medical Wikis</a>                                                                                         | En       | 11/09/11    | 52                                  |
| 10 <a href="#">HLWIKI : Medical wikis</a>                                                                                               | En       | 18/06/11    | 39                                  |
| 11 <a href="#">HLWIKI : Top Web 2.0 Services in Medicine – 2011</a>                                                                     | En       | 11/09/11    | 8                                   |
| 12 <a href="#">HLWIKI : Health librarianship pathfinder</a>                                                                             | En       | 15/07/11    | 5                                   |
| 13 <a href="#">Wikiindex category:medical</a>                                                                                           | En       | 01/09/08    | 50                                  |
| 14 <a href="#">Cutting-edge Web Resources for PT</a>                                                                                    | En       | 19/08/09    | 12                                  |
| 15 <a href="#">WJKB</a>                                                                                                                 | Ch       | Na          | 1                                   |
| 16 <a href="#">Medicina Basada en la Evidencia y Web 2.0</a>                                                                            | Es       | 2008        | 12                                  |
| 17 <a href="#">INTERNET, PEDIATRIA Y LA WEB 2.0</a>                                                                                     | Es       | 23/11/07    | 6                                   |
| 18 <a href="#">Las Tecnologías de la Información y Comunicación (TIC) y la formación continuada: las nuevas herramientas de Web 2.0</a> | Es       | Na          | 1                                   |
| 19 <a href="#">PAMI CAPACITACION : web2.0</a>                                                                                           | Es       | 13/07/11    | 5                                   |
| 20 <a href="#">uroportal.net : wikis</a>                                                                                                | Es       | 29/09/11    | 6                                   |
| 21 <a href="#">Web 2.0 y la medicina</a>                                                                                                | Es       | 02/12/08    | 4                                   |
| 22 <a href="#">Hibakuiryo</a>                                                                                                           | Jp       | Na          | 1                                   |
| 23 <a href="#">JC   Blog</a>                                                                                                            | Fr       | 27/11/07    | 2                                   |

## Appendix 1 : Google search

|                                       |                                                                             |    |          |            |
|---------------------------------------|-----------------------------------------------------------------------------|----|----------|------------|
| 24                                    | <a href="#">Médecine et Web 2.0 : wikis médicaux</a>                        | Fr | 20/08/09 | 8          |
| 25                                    | <a href="#">Internet et ophtalmo : Lettre ouverte : médecine et Web 2.0</a> | Fr | 13/11/07 | 1          |
| 26                                    | <a href="#">Santexel : catalogue 2011</a>                                   | Fr | 04/09/11 | 5          |
| 27                                    | <a href="#">blog.doccheck.com : Medical-Wikimania</a>                       | De | 11/06/07 | 5          |
| Total                                 |                                                                             |    |          | 389        |
| <b>Total after duplicates removed</b> |                                                                             |    |          | <b>141</b> |
