# Supplementary material for: Medical Wikis Dedicated to Clinical Practice: A Systematic Review
Source: PubMed Central journal article supplement (PMC4392552; doi:10.2196/jmir.3574), 2015-02-19
Supplement: jmir_v17i2e48_app2.pdf [file jmir_v17i2e48_app2.pdf]

## Appendix 2: Literature search

| Engine                                  | Search criteria (full text)  | Date     | N articles | Wiki(s) description | Identified URLs |
|-----------------------------------------|------------------------------|----------|------------|---------------------|-----------------|
| Pubmed                                  | wiki AND (medic* OR clinic*) | 01/10/12 | 73         | 54                  | 33              |
| Web of Science                          | wiki AND (medic* OR clinic*) | 01/10/12 | 51         | 36                  | 16              |
| Lilacs                                  | wiki                         | 01/10/12 | 9          | 6                   | 2               |
| Total                                   |                              |          | 133        | 96                  | 51              |
| <b>Total (after duplicates removed)</b> |                              |          | <b>104</b> | <b>72</b>           | <b>38</b>       |
