# Supplementary material for: Medical Wikis Dedicated to Clinical Practice: A Systematic Review
Source: PubMed Central journal article supplement (PMC4392552; doi:10.2196/jmir.3574), 2015-02-19
Supplement: jmir_v17i2e48_app3.pdf [file jmir_v17i2e48_app3.pdf]

### Appendix 3 : Sites exclusions and inclusions

| N   | Site                                                                                                | Access       | Type       | Topic      | Audience   | Status    |
|-----|-----------------------------------------------------------------------------------------------------|--------------|------------|------------|------------|-----------|
| 176 | (25 included)                                                                                       | (35 excl.)   | (19 excl.) | (76 excl.) | (15 excl.) | (6 excl.) |
| 1   | <a href="#">Globus MEDICUS</a>                                                                      | discontinued |            |            |            |           |
| 2   | <a href="#">Scitopics</a>                                                                           | discontinued |            |            |            |           |
| 3   | <a href="#">Zyprexa</a>                                                                             | discontinued |            |            |            |           |
| 4   | <a href="#">Student Clinics Wiki</a>                                                                | empty        |            |            |            |           |
| 5   | <a href="#">Wikinvestigacion</a>                                                                    | empty        |            |            |            |           |
| 6   | <a href="#">Wikiprotein</a>                                                                         | empty        |            |            |            |           |
| 7   | <a href="#">Case School of Dental Medicine Clinic Manual</a>                                        | forbidden    |            |            |            |           |
| 8   | <a href="#">ECCLES HSL wiki</a>                                                                     | forbidden    |            |            |            |           |
| 9   | <a href="#">Epic Systems Corporation's Community Library</a>                                        | forbidden    |            |            |            |           |
| 10  | <a href="#">Just the Facts wiki</a>                                                                 | forbidden    |            |            |            |           |
| 11  | <a href="#">Partners Healthcare eRooms</a>                                                          | forbidden    |            |            |            |           |
| 12  | <a href="#">APF, ASCP and PRODS wiki</a>                                                            | not found    |            |            |            |           |
| 13  | <a href="#">ArrayWiki</a>                                                                           | not found    |            |            |            |           |
| 14  | <a href="#">AutismAspergersWiki</a>                                                                 | not found    |            |            |            |           |
| 15  | <a href="#">BillingWiki</a>                                                                         | not found    |            |            |            |           |
| 16  | <a href="#">BioKb</a>                                                                               | not found    |            |            |            |           |
| 17  | <a href="#">Community Huntington's Disease Community Notebook</a>                                   | not found    |            |            |            |           |
| 18  | <a href="#">Efficient MD Wiki</a>                                                                   | not found    |            |            |            |           |
| 19  | <a href="#">eHealth Wiki (JMIR)</a>                                                                 | not found    |            |            |            |           |
| 20  | <a href="#">Healtheva</a>                                                                           | not found    |            |            |            |           |
| 21  | <a href="#">HerzKinderWiki</a>                                                                      | not found    |            |            |            |           |
| 22  | <a href="#">JournalReview.org</a>                                                                   | not found    |            |            |            |           |
| 23  | <a href="#">MacSurgWiki</a>                                                                         | not found    |            |            |            |           |
| 24  | <a href="#">Medical Practice Billing and Compliance</a>                                             | not found    |            |            |            |           |
| 25  | <a href="#">Medical University of South Carolina Department of Radiology's Medical physics wiki</a> | not found    |            |            |            |           |
| 26  | <a href="#">MedTech Wiki</a>                                                                        | not found    |            |            |            |           |
| 27  | <a href="#">PeacefulBeginnings</a>                                                                  | not found    |            |            |            |           |
| 28  | <a href="#">PubDrug</a>                                                                             | not found    |            |            |            |           |
| 29  | <a href="#">Student Doctor Network Wiki</a>                                                         | not found    |            |            |            |           |
| 30  | <a href="#">TheRemedePointOrgWiki</a>                                                               | not found    |            |            |            |           |
| 31  | <a href="#">WebHealth</a>                                                                           | not found    |            |            |            |           |
| 32  | <a href="#">Wiki des recommandations médicales</a>                                                  | not found    |            |            |            |           |
| 33  | <a href="#">WikiAdvocate</a>                                                                        | not found    |            |            |            |           |
| 34  | <a href="#">WikiLiver</a>                                                                           | not found    |            |            |            |           |
| 35  | <a href="#">WiserWiki</a>                                                                           | not found    |            |            |            |           |
| 36  | <a href="#">Medicalopedia.org</a>                                                                   | Y            | Blog       |            |            |           |

### Appendix 3 : Sites exclusions and inclusions

| N   | Site                                                                 | Access     | Type       | Topic                | Audience   | Status    |
|-----|----------------------------------------------------------------------|------------|------------|----------------------|------------|-----------|
| 176 | (25 included)                                                        | (35 excl.) | (19 excl.) | (76 excl.)           | (15 excl.) | (6 excl.) |
| 37  | <a href="#">WikiBirdFlu</a>                                          | Y          | Blog       |                      |            |           |
| 38  | <a href="#">CIC Quinze-Vingt : études en cours</a>                   | Y          | CMS        |                      |            |           |
| 39  | <a href="#">Consumer Health Information (Toronto Public Library)</a> | Y          | CMS        |                      |            |           |
| 40  | <a href="#">Flu Wikie</a>                                            | Y          | CMS        |                      |            |           |
| 41  | <a href="#">InfoMedMD</a>                                            | Y          | CMS        |                      |            |           |
| 42  | <a href="#">Medcyclopaedia</a>                                       | Y          | CMS        |                      |            |           |
| 43  | <a href="#">MedSkills wiki project</a>                               | Y          | CMS        |                      |            |           |
| 44  | <a href="#">Plant antiVenom</a>                                      | Y          | CMS        |                      |            |           |
| 45  | <a href="#">SmpaWiki</a>                                             | Y          | CMS        |                      |            |           |
| 46  | <a href="#">Wikinu Médecine</a>                                      | Y          | CMS        |                      |            |           |
| 47  | <a href="#">WikiPremed MCAT Course</a>                               | Y          | CMS        |                      |            |           |
| 48  | <a href="#">AspiesForFreedom</a>                                     | Y          | forum      |                      |            |           |
| 49  | <a href="#">Sermo</a>                                                | Y          | forum      |                      |            |           |
| 50  | <a href="#">Videnbasen for Tourette Syndrom</a>                      | Y          | forum      |                      |            |           |
| 51  | <a href="#">WikiHealthCare</a>                                       | Y          | forum      |                      |            |           |
| 52  | <a href="#">Google's Knol</a>                                        | Y          | other      |                      |            |           |
| 53  | <a href="#">HealthMash</a>                                           | Y          | other      |                      |            |           |
| 54  | <a href="#">Wikia : Wikia Category: Health</a>                       | Y          | other      |                      |            |           |
| 55  | <a href="#">BRL-CAD wiki</a>                                         | Y          | Wiki       | Informatics          |            |           |
| 56  | <a href="#">Clinfowiki</a>                                           | Y          | Wiki       | Informatics          |            |           |
| 57  | <a href="#">Clinical Research Informatics Wiki</a>                   | Y          | Wiki       | Informatics          |            |           |
| 58  | <a href="#">COMKAT</a>                                               | Y          | Wiki       | Informatics          |            |           |
| 59  | <a href="#">Gnumed</a>                                               | Y          | Wiki       | Informatics          |            |           |
| 60  | <a href="#">HealthGrid Wiki</a>                                      | Y          | Wiki       | Informatics          |            |           |
| 61  | <a href="#">Iphylo</a>                                               | Y          | Wiki       | Informatics          |            |           |
| 62  | <a href="#">KnowWE</a>                                               | Y          | Wiki       | Informatics          |            |           |
| 63  | <a href="#">OpenEMR Documentation Wiki</a>                           | Y          | Wiki       | Informatics          |            |           |
| 64  | <a href="#">openMRS</a>                                              | Y          | Wiki       | Informatics          |            |           |
| 65  | <a href="#">Pathology Informatics wiki</a>                           | Y          | Wiki       | Informatics          |            |           |
| 66  | <a href="#">saferEHR</a>                                             | Y          | Wiki       | Informatics          |            |           |
| 67  | <a href="#">TOPSAN</a>                                               | Y          | Wiki       | Informatics          |            |           |
| 68  | <a href="#">Wikia : Biomedical Cybernetics Wiki</a>                  | Y          | Wiki       | Informatics          |            |           |
| 69  | <a href="#">age-phenome-wiki</a>                                     | Y          | Wiki       | Fundamental sciences |            |           |
| 70  | <a href="#">CHDwiki</a>                                              | Y          | Wiki       | Fundamental sciences |            |           |
| 71  | <a href="#">conceptwiki - wikiproteins</a>                           | Y          | Wiki       | Fundamental sciences |            |           |
| 72  | <a href="#">Fuse</a>                                                 | Y          | Wiki       | Fundamental sciences |            |           |
| 73  | <a href="#">Harvester Wiki</a>                                       | Y          | Wiki       | Fundamental sciences |            |           |

### Appendix 3 : Sites exclusions and inclusions

| N   | Site                                                                                           | Access     | Type       | Topic                | Audience   | Status    |
|-----|------------------------------------------------------------------------------------------------|------------|------------|----------------------|------------|-----------|
| 176 | (25 included)                                                                                  | (35 excl.) | (19 excl.) | (76 excl.)           | (15 excl.) | (6 excl.) |
| 74  | <a href="#">OpenWetWare</a>                                                                    | Y          | Wiki       | Fundamental sciences |            |           |
| 75  | <a href="#">NeuroAnatomy</a>                                                                   | Y          | Wiki       | Fundamental sciences |            |           |
| 76  | <a href="#">Pamela Stanley Lab Wiki</a>                                                        | Y          | Wiki       | Fundamental sciences |            |           |
| 77  | <a href="#">SilicoTryp wiki</a>                                                                | Y          | Wiki       | Fundamental sciences |            |           |
| 78  | <a href="#">Snpedia</a>                                                                        | Y          | Wiki       | Fundamental sciences |            |           |
| 79  | <a href="#">WikiGenes</a>                                                                      | Y          | Wiki       | Fundamental sciences |            |           |
| 80  | <a href="#">Urgencyclopedia</a>                                                                | Y          | Wiki       | First aid            |            |           |
| 81  | <a href="#">Wikia : Street Medic Wikia</a>                                                     | Y          | Wiki       | First aid            |            |           |
| 82  | <a href="#">NAHRS/MLA Nursing Resources wiki</a>                                               | Y          | Wiki       | Nursing              |            |           |
| 83  | <a href="#">Nursing Wiki</a>                                                                   | Y          | Wiki       | Nursing              |            |           |
| 84  | <a href="#">Neuromuscular PT Evidence</a>                                                      | Y          | Wiki       | Physiotherapy        |            |           |
| 85  | <a href="#">Physiopedia</a>                                                                    | Y          | Wiki       | Physiotherapy        |            |           |
| 86  | <a href="#">The Lenore Thomson Exegesis Wiki</a>                                               | Y          | Wiki       | Psychology           |            |           |
| 87  | <a href="#">Wikia : Psychology wiki</a>                                                        | Y          | Wiki       | Psychology           |            |           |
| 88  | <a href="#">ADEpedia</a>                                                                       | Y          | Wiki       | Medical research     |            |           |
| 89  | <a href="#">EBHC Search Strategies Wiki</a>                                                    | Y          | Wiki       | Medical research     |            |           |
| 90  | <a href="#">Family Medicine Research wiki</a>                                                  | Y          | Wiki       | Medical research     |            |           |
| 91  | <a href="#">Medical Images Wiki</a>                                                            | Y          | Wiki       | Medical research     |            |           |
| 92  | <a href="#">Neurodegeneration Research Wiki</a>                                                | Y          | Wiki       | Medical research     |            |           |
| 93  | <a href="#">OBI Wiki</a>                                                                       | Y          | Wiki       | Medical research     |            |           |
| 94  | <a href="#">Wikia : Quality of Medical Data</a>                                                | Y          | Wiki       | Medical research     |            |           |
| 95  | <a href="#">e-Meducation</a>                                                                   | Y          | Wiki       | Medical bibliography |            |           |
| 96  | <a href="#">EBM Librarian</a>                                                                  | Y          | Wiki       | Medical bibliography |            |           |
| 97  | <a href="#">Médecine et Web 2.0</a>                                                            | Y          | Wiki       | Medical bibliography |            |           |
| 98  | <a href="#">Medical Matters Wiki - University south alabama</a>                                | Y          | Wiki       | Medical bibliography |            |           |
| 99  | <a href="#">MLA-HLS Wiki</a>                                                                   | Y          | Wiki       | Medical bibliography |            |           |
| 100 | <a href="#">palliative care resources for palliative physician assistant</a>                   | Y          | Wiki       | Medical bibliography |            |           |
| 101 | <a href="#">Wiki des Bibliothèques Universitaires de Médecine et Santé Publique – Lausanne</a> | Y          | Wiki       | Medical bibliography |            |           |
| 102 | <a href="#">International Aids Vigil, Toronto</a>                                              | Y          | Wiki       | Patient information  |            |           |
| 103 | <a href="#">Muko-wiki</a>                                                                      | Y          | Wiki       | Patient information  |            |           |
| 104 | <a href="#">Wikia : Autism Wiki</a>                                                            | Y          | Wiki       | Patient information  |            |           |
| 105 | <a href="#">Wikia : Cancer Help Infosite</a>                                                   | Y          | Wiki       | Patient information  |            |           |
| 106 | <a href="#">Wikia : Celiac Wiki</a>                                                            | Y          | Wiki       | Patient information  |            |           |
| 107 | <a href="#">WikiCancer</a>                                                                     | Y          | Wiki       | Patient information  |            |           |
| 108 | <a href="#">Medical Education Home</a>                                                         | Y          | Wiki       | Medical curriculum   |            |           |
| 109 | <a href="#">Mediwiki</a>                                                                       | Y          | Wiki       | Medical curriculum   |            |           |

### Appendix 3 : Sites exclusions and inclusions

| N   | Site                                                         | Access     | Type       | Topic              | Audience   | Status       |
|-----|--------------------------------------------------------------|------------|------------|--------------------|------------|--------------|
| 176 | (25 included)                                                | (35 excl.) | (19 excl.) | (76 excl.)         | (15 excl.) | (6 excl.)    |
| 110 | <a href="#">UML - Anesthesia Clinical Assistants Program</a> | Y          | Wiki       | Medical curriculum |            |              |
| 111 | <a href="#">WikiTox</a>                                      | Y          | Wiki       | Medical curriculum |            |              |
| 112 | <a href="#">PharmLib</a>                                     | Y          | Wiki       | Pharmacology       |            |              |
| 113 | <a href="#">RxWiki</a>                                       | Y          | Wiki       | Pharmacology       |            |              |
| 114 | <a href="#">Wikia : DrogenWiki</a>                           | Y          | Wiki       | Pharmacology       |            |              |
| 115 | <a href="#">Fluwiki</a>                                      | Y          | Wiki       | Public Health      |            |              |
| 116 | <a href="#">McGill Library Global Health Resource Guide</a>  | Y          | Wiki       | Public Health      |            |              |
| 117 | <a href="#">MIGHEALTHNET</a>                                 | Y          | Wiki       | Public Health      |            |              |
| 118 | <a href="#">Health++</a>                                     | Y          | Wiki       | Health-related     |            |              |
| 119 | <a href="#">HLWIKI Canada</a>                                | Y          | Wiki       | Health-related     |            |              |
| 120 | <a href="#">Rife Wiki</a>                                    | Y          | Wiki       | Health-related     |            |              |
| 121 | <a href="#">Wellness Wiki</a>                                | Y          | Wiki       | Health-related     |            |              |
| 122 | <a href="#">Wikia : Pet Diabetes Wiki</a>                    | Y          | Wiki       | Health-related     |            |              |
| 123 | <a href="#">WikiHealth</a>                                   | Y          | Wiki       | Health-related     |            |              |
| 124 | <a href="#">Charity Scorecard</a>                            | Y          | Wiki       | Other              |            |              |
| 125 | <a href="#">Citizendium</a>                                  | Y          | Wiki       | Other              |            |              |
| 126 | <a href="#">Knowledge Unifying Initiator</a>                 | Y          | Wiki       | Other              |            |              |
| 127 | <a href="#">WikiIndex</a>                                    | Y          | Wiki       | Other              |            |              |
| 128 | <a href="#">Wikilearning</a>                                 | Y          | Wiki       | Other              |            |              |
| 129 | <a href="#">Wikimedia : Wikisource</a>                       | Y          | Wiki       | Other              |            |              |
| 130 | <a href="#">WJBK</a>                                         | Y          | Wiki       | Other              |            |              |
| 131 | <a href="#">AIDS Wiki</a>                                    | Y          | Wiki       | Medicine           | Other      |              |
| 132 | <a href="#">atwiki/hibakuiryo (medical radiation@wiki)</a>   | Y          | Wiki       | Medicine           | Other      |              |
| 133 | <a href="#">Clusterkopfschmerz: CK-Wissen</a>                | Y          | Wiki       | Medicine           | Other      |              |
| 134 | <a href="#">Ferato</a>                                       | Y          | Wiki       | Medicine           | Other      |              |
| 135 | <a href="#">HivWiki</a>                                      | Y          | Wiki       | Medicine           | Other      |              |
| 136 | <a href="#">Psywiki.org</a>                                  | Y          | Wiki       | Medicine           | Other      |              |
| 137 | <a href="#">surgwiki</a>                                     | Y          | Wiki       | Medicine           | Na         |              |
| 138 | <a href="#">Wikia : Diabetes Wiki</a>                        | Y          | Wiki       | Medicine           | Other      |              |
| 139 | <a href="#">Wikia : Flu Wiki</a>                             | Y          | Wiki       | Medicine           | Other      |              |
| 140 | <a href="#">Wikia : Medical Imaging</a>                      | Y          | Wiki       | Medicine           | Other      |              |
| 141 | <a href="#">Wikia : Wikianswers Doctors</a>                  | Y          | Wiki       | Medicine           | Other      |              |
| 142 | <a href="#">Wikimedia : Wikibooks : Health sciences</a>      | Y          | Wiki       | Medicine           | Other      |              |
| 143 | <a href="#">Wikimedia : WikiMedia Commons – Medicine</a>     | Y          | Wiki       | Medicine           | Other      |              |
| 144 | <a href="#">Wikimedia : Wikipedia : Medicine Portal</a>      | Y          | Wiki       | Medicine           | Other      |              |
| 145 | <a href="#">Wikimedia : Wikiversity - School:Medicine</a>    | Y          | Wiki       | Medicine           | Other      |              |
| 146 | <a href="#">QTinterval Wiki</a>                              | Y          | Wiki       | Medicine           | Phys.      | Discontinued |
| 147 | <a href="#">RadsWiki</a>                                     | Y          | Wiki       | Medicine           | Phys.      | Discontinued |

### Appendix 3 : Sites exclusions and inclusions

| N   | Site                                     | Access     | Type       | Topic      | Audience     | Status    |
|-----|------------------------------------------|------------|------------|------------|--------------|-----------|
| 176 | (25 included)                            | (35 excl.) | (19 excl.) | (76 excl.) | (15 excl.)   | (6 excl.) |
| 148 | <a href="#">Radiology Wiki</a>           | Y          | Wiki       | Medicine   | Phys.        | Empty     |
| 149 | <a href="#">Wikisurgery</a>              | Y          | Wiki       | Medicine   | Phys.        | Empty     |
| 150 | <a href="#">KidneyWiki</a>               | Y          | Wiki       | Medicine   | Phys., stud. | Not found |
| 151 | <a href="#">WikiMD</a>                   | Y          | Wiki       | Medicine   | Phys., stud. | Spammed   |
| 152 | <a href="#">AskDrWiki</a>                | Y          | Wiki       | Medicine   | Phys., stud. | Operating |
| 153 | <a href="#">DocCheck Flexikon</a>        | Y          | Wiki       | Medicine   | Phys.        | Operating |
| 154 | <a href="#">Dermpedia</a>                | Y          | Wiki       | Medicine   | Phys., stud. | Operating |
| 155 | <a href="#">ECGpedia</a>                 | Y          | Wiki       | Medicine   | Phys., stud. | Operating |
| 156 | <a href="#">EyeWiki</a>                  | Y          | Wiki       | Medicine   | Phys.        | Operating |
| 157 | <a href="#">Ganfyd</a>                   | Y          | Wiki       | Medicine   | Phys.        | Operating |
| 158 | <a href="#">Mediwiki.fr</a>              | Y          | Wiki       | Medicine   | Stud.        | Operating |
| 159 | <a href="#">Medpedia</a>                 | Y          | Wiki       | Medicine   | Phys.        | Operating |
| 160 | <a href="#">MedRevise</a>                | Y          | Wiki       | Medicine   | Stud.        | Operating |
| 161 | <a href="#">Onco Wiki</a>                | Y          | Wiki       | Medicine   | Phys., stud. | Operating |
| 162 | <a href="#">Oncologik</a>                | Y          | Wiki       | Medicine   | Phys.        | Operating |
| 163 | <a href="#">Open Anesthesia</a>          | Y          | Wiki       | Medicine   | Phys., stud. | Operating |
| 164 | <a href="#">Open Medicine</a>            | Y          | Wiki       | Medicine   | Phys.        | Operating |
| 165 | <a href="#">Orthochina</a>               | Y          | Wiki       | Medicine   | Phys.        | Operating |
| 166 | <a href="#">Pathowiki</a>                | Y          | Wiki       | Medicine   | Phys.        | Operating |
| 167 | <a href="#">Pathpedia – wikibook</a>     | Y          | Wiki       | Medicine   | Phys.        | Operating |
| 168 | <a href="#">Radiopaedia</a>              | Y          | Wiki       | Medicine   | Phys.        | Operating |
| 169 | <a href="#">Toxipedia</a>                | Y          | Wiki       | Medicine   | Phys.        | Operating |
| 170 | <a href="#">UCLA Radiology Residents</a> | Y          | Wiki       | Medicine   | Stud.        | Operating |
| 171 | <a href="#">WardWiki</a>                 | Y          | Wiki       | Medicine   | Phys., stud. | Operating |
| 172 | <a href="#">Wikia : Biomedwiki</a>       | Y          | Wiki       | Medicine   | Phys., stud. | Operating |
| 173 | <a href="#">WikiDoc</a>                  | Y          | Wiki       | Medicine   | Phys.        | Operating |
| 174 | <a href="#">WikiEcho</a>                 | Y          | Wiki       | Medicine   | Phys.        | Operating |
| 175 | <a href="#">WikiEM</a>                   | Y          | Wiki       | Medicine   | Phys., stud. | Operating |
| 176 | <a href="#">WikiRadiography</a>          | Y          | Wiki       | Medicine   | Phys.        | Operating |
